# Supplementary material for: Low-Frequency Vibrations of Saccharides Using Terahertz Time-Domain Spectroscopy and Ab-Initio Simulations
Source: MDPI journal article supplement (doi:10.3390/app13179719), 2023-08-28
Supplement: s1 [file s1]

Archive with 1 entries (1 files):
- applsci-2562460-supplementary.pdf
