# Supplementary material for: Low-Frequency Vibrations of Saccharides Using Terahertz Time-Domain Spectroscopy and Ab-Initio Simulations
Source: MDPI journal article supplement (doi:10.3390/app13179719), 2023-08-28
Supplement: s1 [file s1 › applsci-2562460-supplementary.pdf]

## Supplementary Information for “Low-Frequency Vibrations of Saccharides Using Terahertz Time-Domain Spectroscopy and Ab-Initio Simulations”

Andreea Aura Paraipan,<sup>1</sup> Nicole Luchetti,<sup>2,3</sup> Adriano Mosca Conte,<sup>4</sup> Olivia Pulci,<sup>5</sup> and Mauro Messori,<sup>4,6\*</sup>

<sup>1</sup> *Énergie, Matériaux et Télécommunications, Institut National de la Recherche Scientifique (INRS), 1650 Boulevard Lionel Boulet, Varennes, QC J3X 1S2, Canada.*

<sup>2</sup> *Department of Engineering, Campus Bio-Medico University of Rome, Via Álvaro del Portillo 21, 00128 Rome, Italy.*

<sup>3</sup> *Center for Life Nano- & Neuro-Science, Italian Institute of Technology, Viale Regina Elena 291, 00161 Rome, Italy.*

<sup>4</sup> *Institute of Complex Systems, National Research Council (CNR-ISC), Piazzale Aldo Moro 5, 00185 Rome, Italy.*

<sup>5</sup> *ETSF, Department of Physics, Tor Vergata University of Rome, Via della Ricerca Scientifica 1, 00133, Rome, Italy.*

<sup>6</sup> *Department of Physics, Sapienza University of Rome, Piazzale Aldo Moro 5, 00185 Rome, Italy.*

\* Correspondence: [mauro.messori@cnr.it](mailto:mauro.messori@cnr.it)

### THz-TDS system

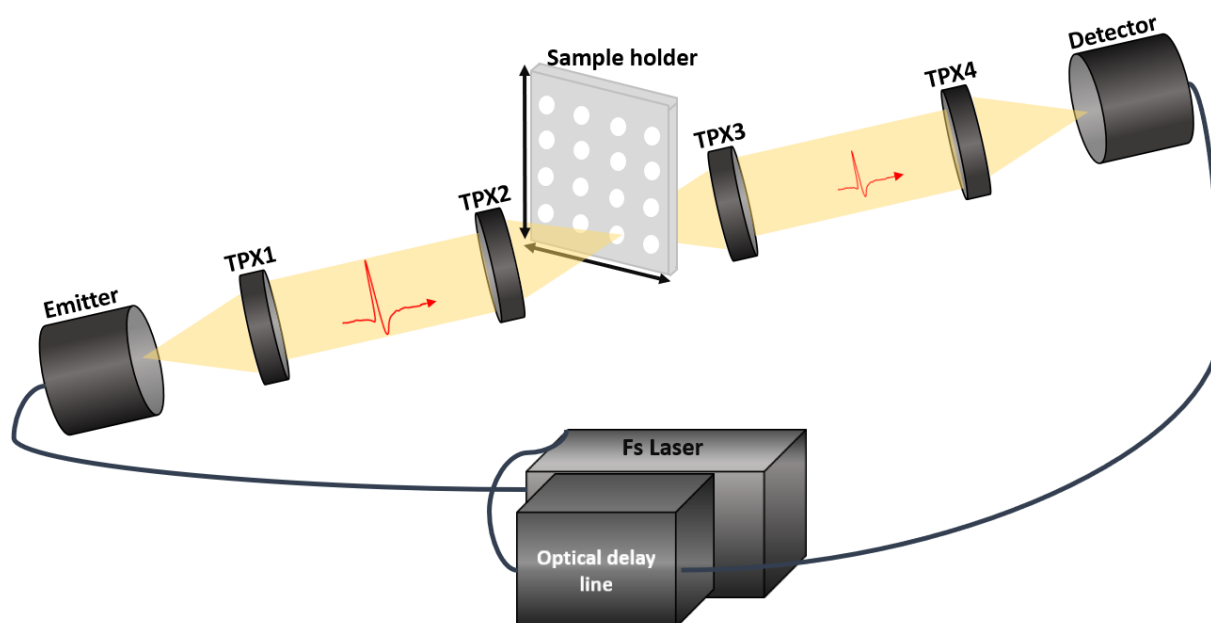

Figure S1: Sketch of the THz beamline used for the experiments with the multiple sample holder. TPX1 to TPX4 are polymethylpentene lenses with 50 mm focal length.

## Dynamic range (DR) of the THz-TDS system

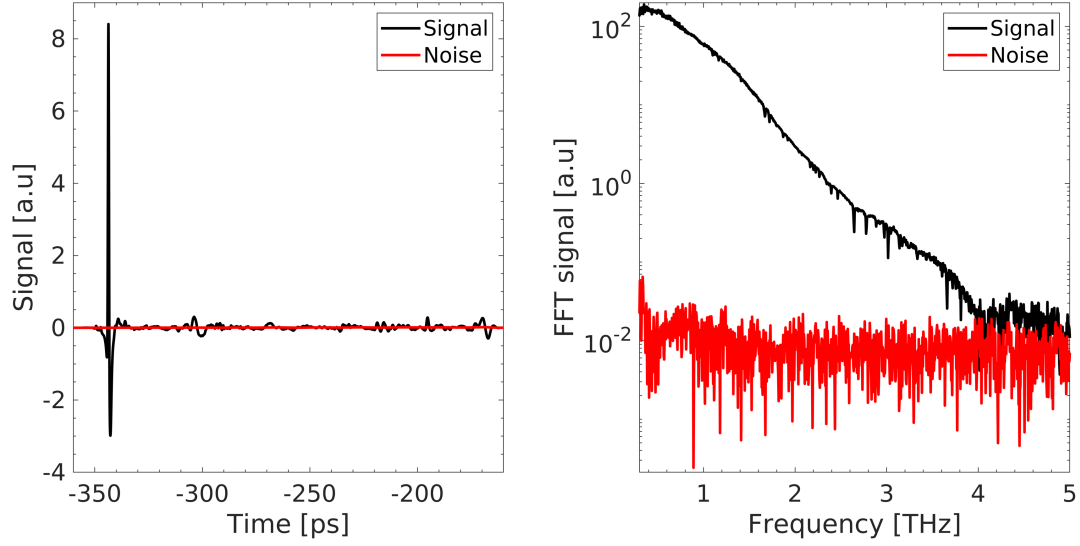

Figure S2: Time traces (left) and Fourier transform of the THz signal (right) propagating through the dry N<sub>2</sub> (black lines) and the noise floor of the system (red lines).

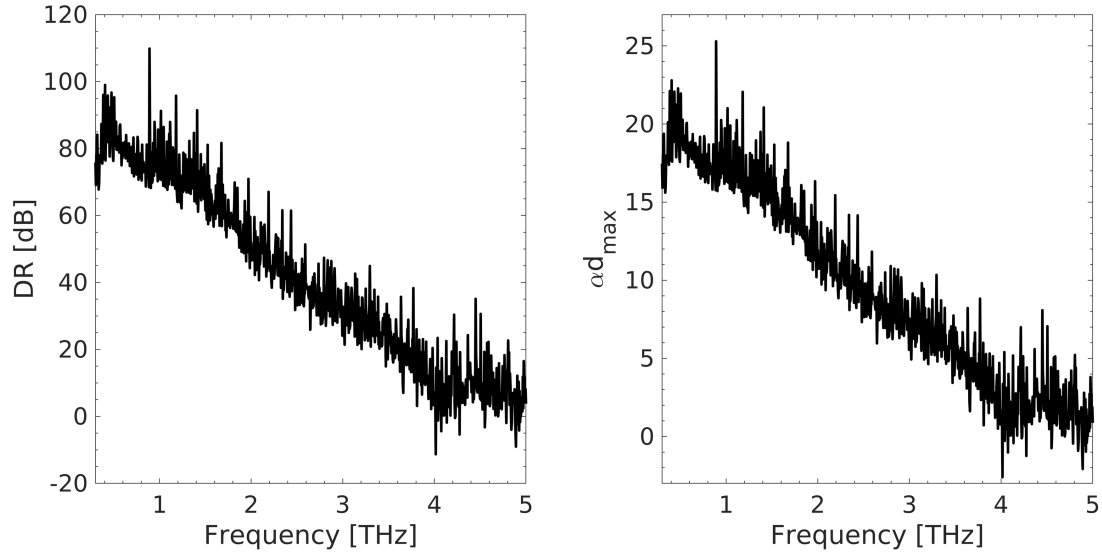

Figure S3: The DR (left) and highest measurable absorbance ( $\alpha d_{\max}$ ) (right) of the THz-TDS system.

## Mass density values

| Sample label | Density [g/cm <sup>3</sup> ] | References |
|--------------|------------------------------|------------|
| GLU          | 1.56                         | [61]       |
| GAL          | 1.50                         | [*]        |
| aLM          | 1.55                         | [61]       |
| aLA          | 1.54                         | [39]       |
| bLA          | 1.59                         | [61]       |
| CBS          | 1.55                         | [57]       |
| CEL          | 1.50                         | [60]       |
| PET          | 0.96                         | [62]       |

Table S1: Typical nominal density of the investigated saccharides and PET, as reported in the literature [39, 57,60 – 62] and \* from ChemSpider (<http://www.chemspider.com/Chemical-Structure.2301265.html>, accessed on 24 February 2020).

## Experimental and simulated modes frequencies

| Compound    | Experimental frequency<br>(THz) | Simulated frequency<br>(THz)                   |
|-------------|---------------------------------|------------------------------------------------|
| CBS         | 1.24                            | 0.89 (mode #1)                                 |
|             | 1.54                            | 1.53 (mode #2)                                 |
|             | 2.07                            | 2.01 (mode #4), 2.06 (mode #5), 2.15 (mode #6) |
|             | 2.31                            | 2.42 (mode #7), 2.48 (mode #8)                 |
|             | 2.66                            | 2.77 (mode #9)                                 |
| $\beta$ LA  | 1.85                            | 1.79 (mode #2), 1.83 (mode #3)                 |
|             | 2.21                            | 2.27 (mode #4)                                 |
| CEL         | 2.15                            | 2.23 (mode #2)                                 |
|             | 2.73                            | 2.73 (mode #3)                                 |
|             | 3.00                            | 3.00 (mode #4)                                 |
|             | 3.19                            | 3.27 (mode #5)                                 |
| GLU         | 1.43                            | 1.61 (mode #1)                                 |
|             | 2.08                            | 2.05 (mode #4)                                 |
|             | 2.52                            | 2.54 (mode #7)                                 |
|             | 2.68                            | 2.77 (mode #8)                                 |
|             | 2.92                            | 3.00 (mode #9)                                 |
| GAL         | 2.13                            | 2.17 (mode #3)                                 |
|             | 2.32                            | 2.33 (mode #5)                                 |
| $\alpha$ LA | 1.19                            | 1.04 (mode #2)                                 |
|             | 1.86                            | 1.93 (mode #4)                                 |
|             | 2.20                            | 2.25 (mode #5)                                 |
|             | 2.38                            | 2.38 (mode #6)                                 |
|             | 2.68                            | 2.84 (mode #7)                                 |
| $\alpha$ LM | 0.53                            | 1.12 (mode #1)                                 |
|             | 1.37                            | 1.40 (mode #2)                                 |
|             | 2.55                            | 2.51 (mode #6)                                 |
|             | 2.87                            | 2.82 (mode #7)                                 |

Table S2: Experimental THz frequencies modes associated with the simulated ones and the correspondent mode number.

## Simulated crystal structures

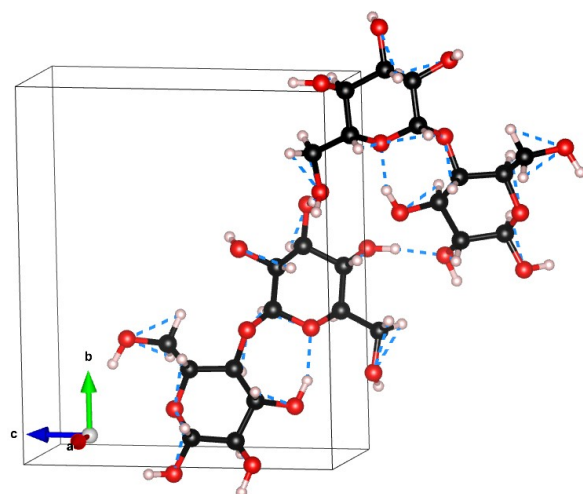

Figure S4: Ball and stick representation of CBS molecular crystal. The unit cell is indicated with a box. Black, red, and white spheres represent, respectively, carbon, oxygen and hydrogen atoms, and the azure dotted lines the H-bonds.

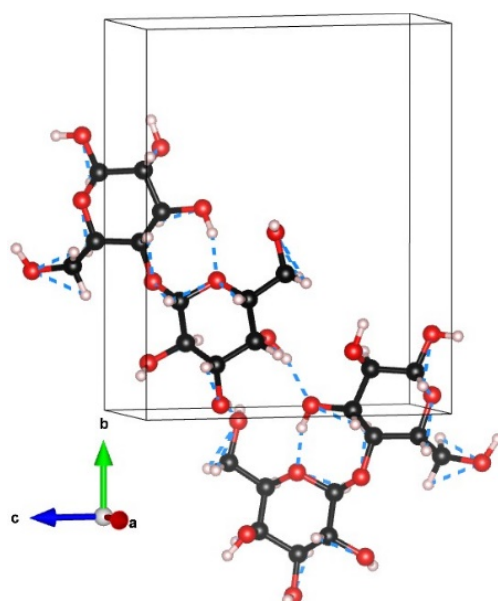

Figure S5: Ball and stick representation of  $\beta$ LA molecular crystal. The unit cell is indicated with a box. Black, red, and white spheres represent, respectively, carbon, oxygen, and hydrogen atoms, and the azure dotted lines the H-bonds.

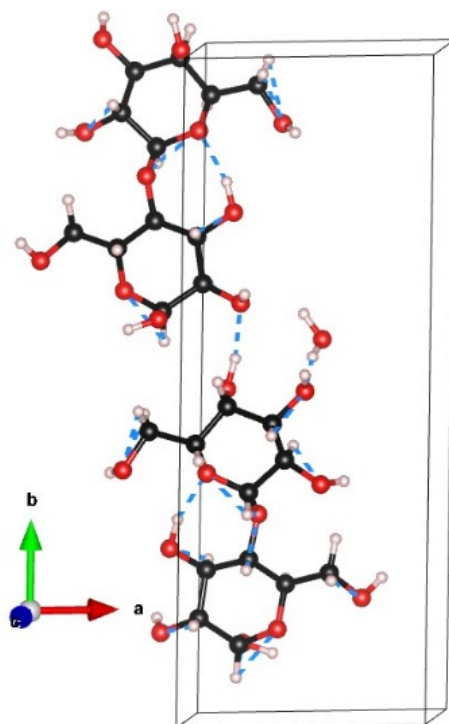

Figure S6: Ball and stick representation of  $\alpha$ LM molecular crystal. The unit cell is indicated with a box. Black, red, and white spheres represent, respectively, carbon, oxygen and hydrogen atoms, and the azure dotted lines the H-bonds.

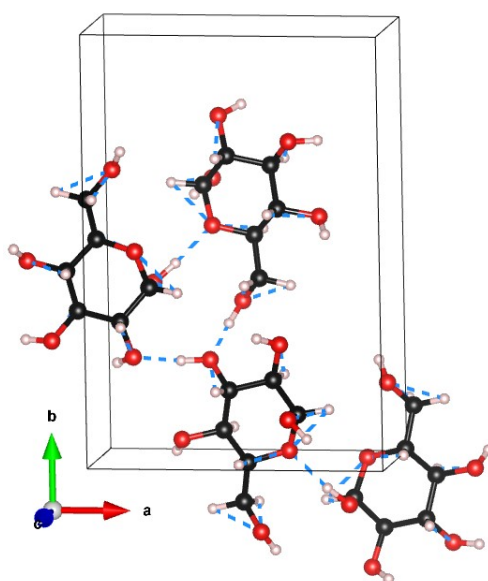

Figure S7: Ball and stick representation of GLU molecular crystal. The unit cell is indicated with a box. Black, red, and white spheres represent, respectively, carbon, oxygen and hydrogen atoms, and the azure dotted lines the H-bonds.

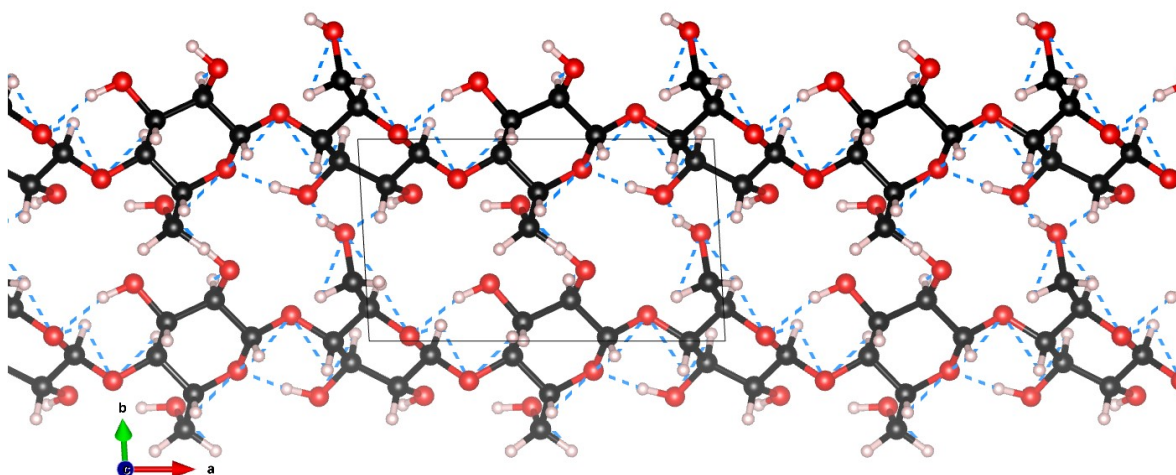

Figure S8: Ball and stick representation of CEL molecular crystal. The unit cell is indicated with a box. Black, red, and white spheres represent, respectively, carbon, oxygen and hydrogen atoms, and the azure dotted lines the H-bonds.

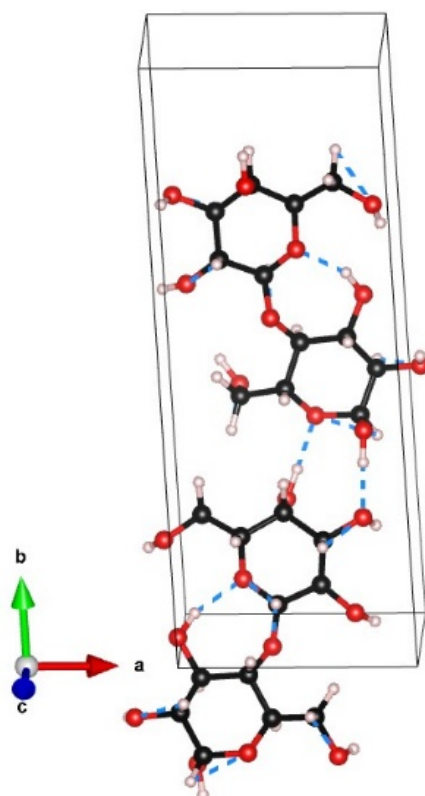

Figure S9: Ball and stick representation of  $\alpha$ LA molecular crystal. The unit cell is indicated with a box. Black, red, and white spheres represent, respectively, carbon, oxygen and hydrogen atoms, and the azure dotted lines the H-bonds.

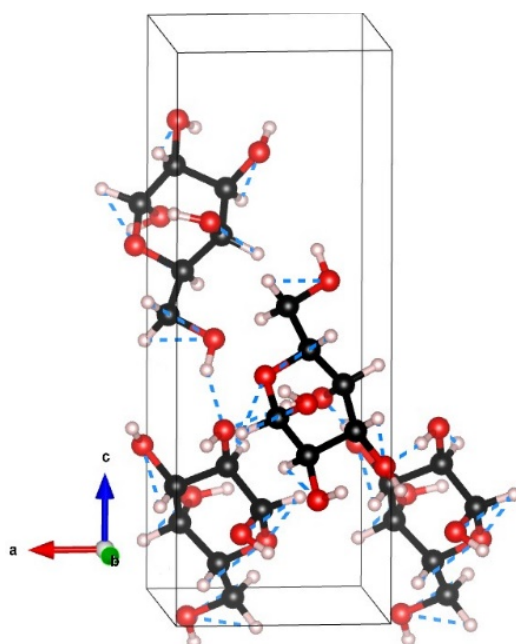

Figure S10: Ball and stick representation of GAL molecular crystal. The unit cell is indicated with a box. Black, red, and white spheres represent, respectively, carbon, oxygen and hydrogen atoms, and the azure dotted lines the H-bonds.

| Molecule    | a (Å) | b (Å) | c (Å) | $\alpha$ | $\beta$ | $\gamma$ |
|-------------|-------|-------|-------|----------|---------|----------|
| CBS         | 4.72  | 12.60 | 10.55 | 90°      | 90°     | 90°      |
| $\beta$ LA  | 4.37  | 12.55 | 10.12 | 90°      | 92.8°   | 90°      |
| $\alpha$ LM | 8.04  | 21.12 | 4.62  | 90°      | 112.6°  | 90°      |
| GLU         | 10.19 | 14.93 | 4.72  | 90°      | 90°     | 90°      |
| CEL         | 10.23 | 8.04  | 6.06  | 46.2°    | 88°     | 91°      |
| $\alpha$ LA | 7.76  | 19.80 | 4.77  | 92.8°    | 107.1°  | 97.7°    |
| GAL         | 5.69  | 7.65  | 15.29 | 90°      | 90°     | 90°      |

Table S3: Unit cell parameters for all simulated systems. a, b, and c are the primitive vectors lengths, and  $\alpha$ ,  $\beta$ , and  $\gamma$  are the axial angles.

## Refractive indexes of the studied saccharides

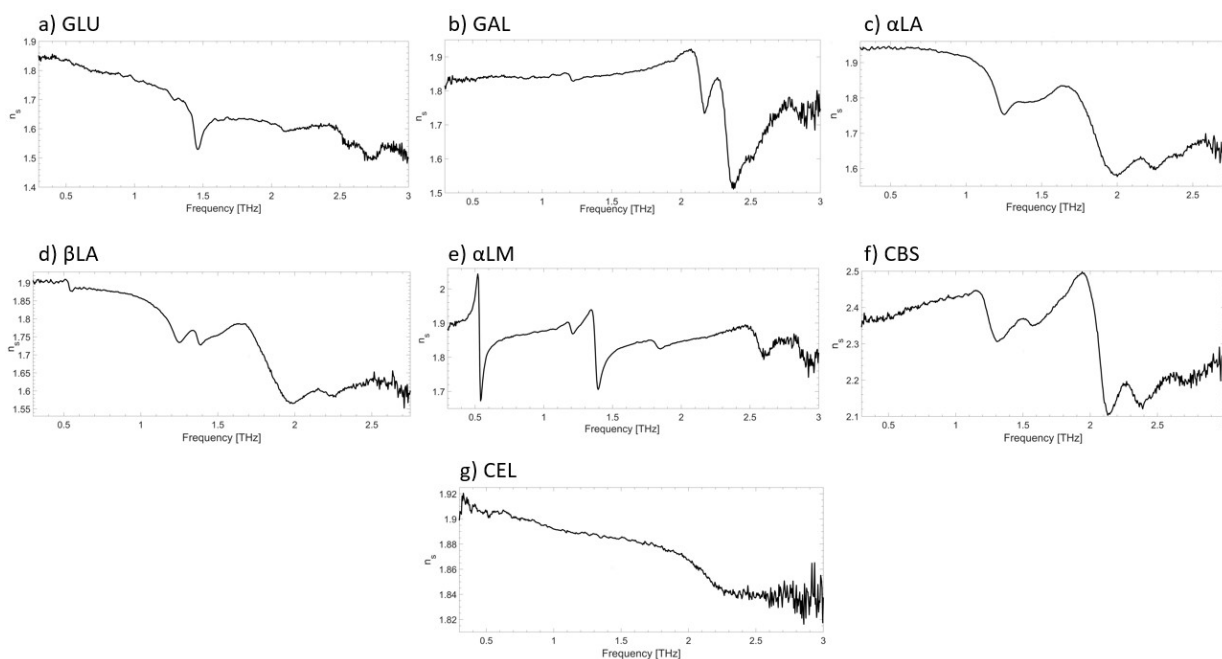

Figure S11: Refractive index,  $n_s$ , of (a) GLU, (b) GAL, (c)  $\alpha$ LA, (d)  $\beta$ LA, (e)  $\alpha$ LM, (f) CBS, (g) CEL.

## Displacement vectors

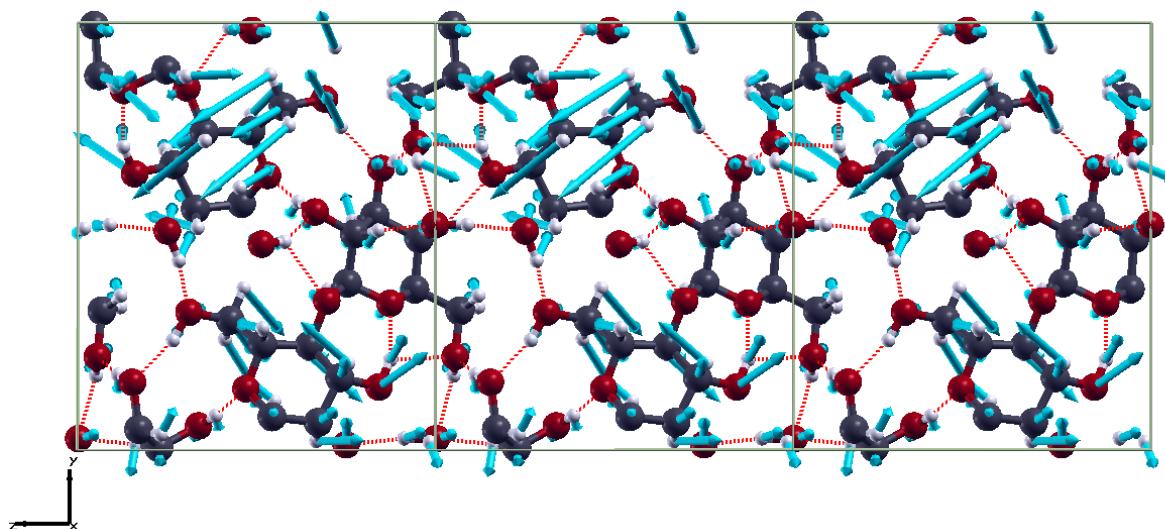

Figure S12: Atomic displacement vectors of CBS for mode 5 at 2.06 THz. Black, red, and white spheres represent, respectively, carbon, oxygen and hydrogen atoms, and the red dotted lines the H-bonds.

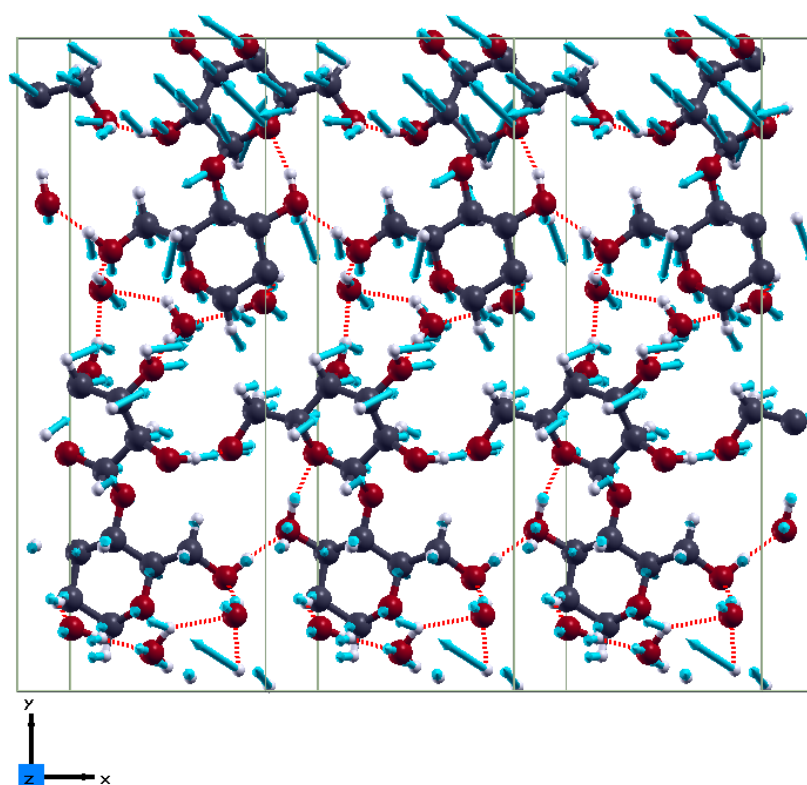

Figure S13: Atomic displacement vectors of  $\alpha$ LM for mode 2 at 1.40 THz. Yellow, red, and cyan spheres represent, respectively, carbon, oxygen and hydrogen atoms, and the red dotted lines the H-bonds.

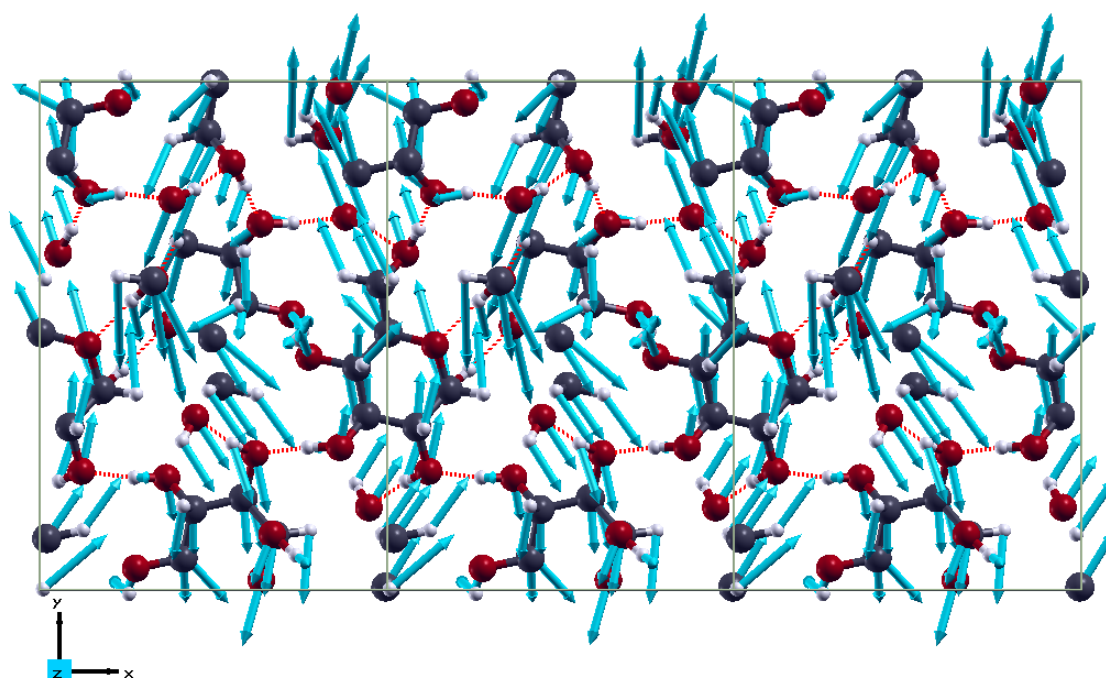

Figure S14: Atomic displacement vectors of GLU for mode 7 at 2.54 THz. Yellow, red, and cyan spheres represent, respectively, carbon, oxygen and hydrogen atoms, and the red dotted lines the H-bonds.

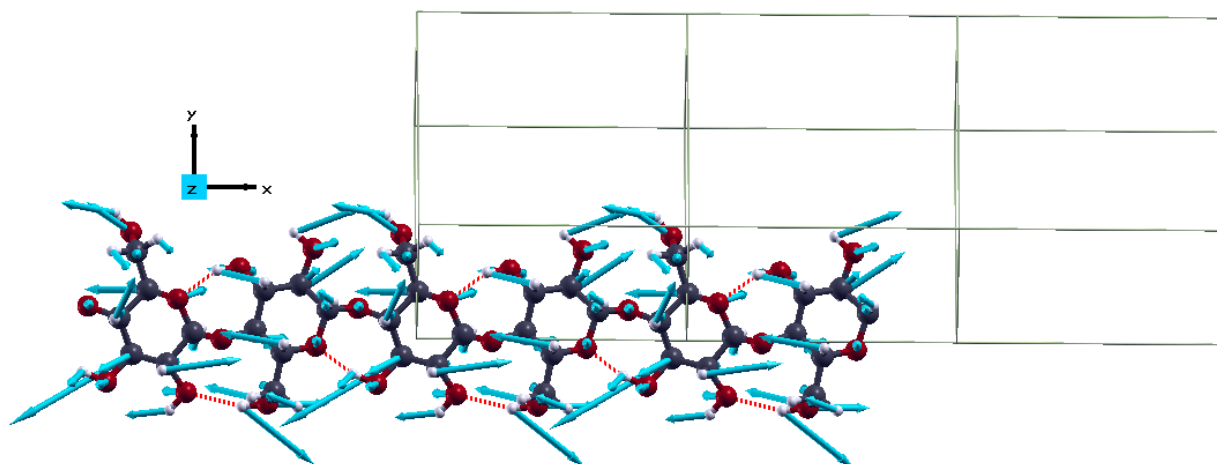

Figure S15: Atomic displacement vectors of CEL for mode 2 at 2.23 THz. Yellow, red, and cyan spheres represent, respectively, carbon, oxygen and hydrogen atoms, and the red dotted lines the H-bonds.

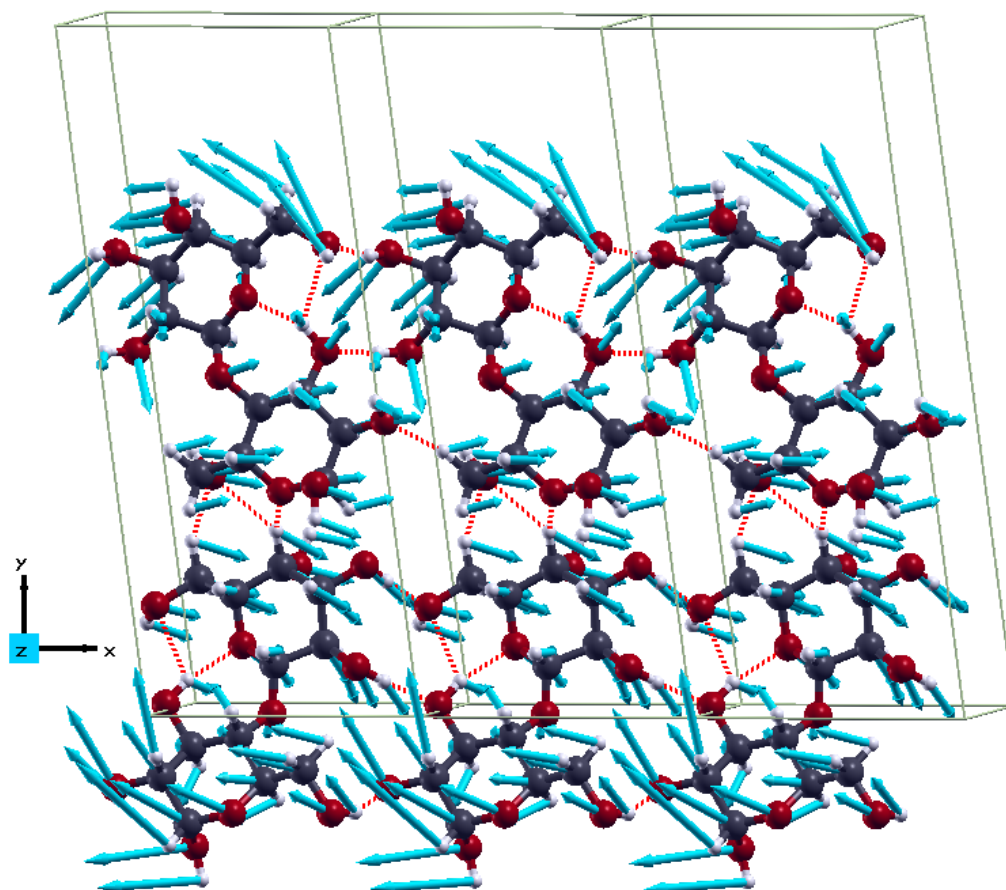

Figure S16: Atomic displacement vectors of  $\alpha$ LA for mode 4 at 1.93 THz. Yellow, red, and cyan spheres represent, respectively, carbon, oxygen and hydrogen atoms, and the red dotted lines the H-bonds.

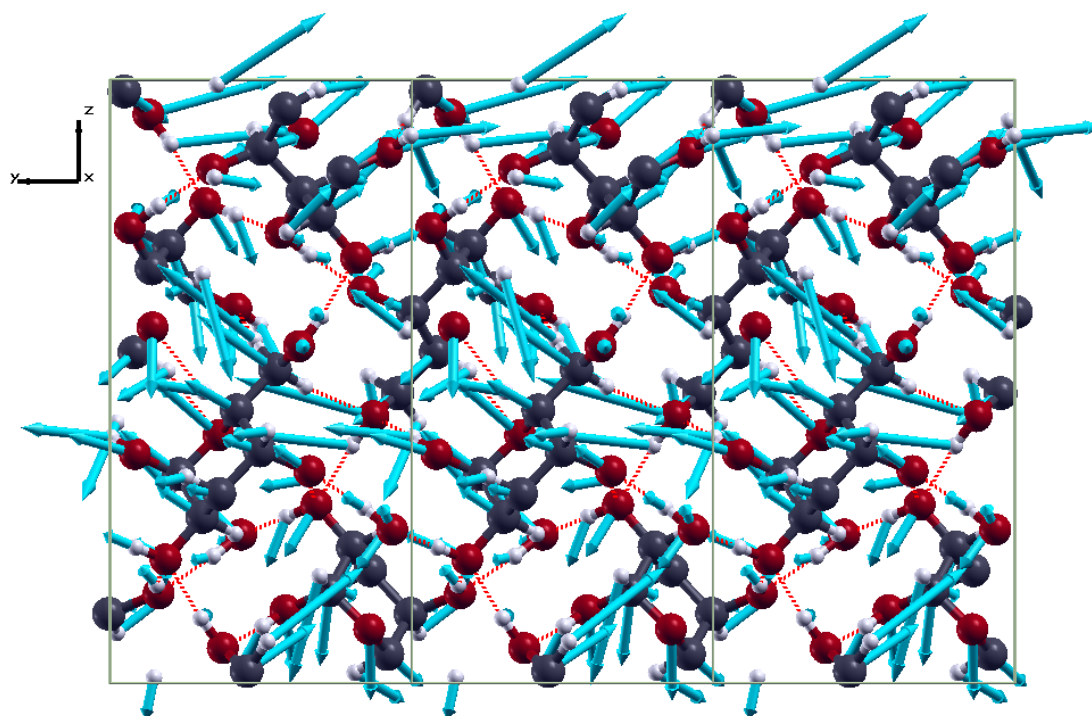

Figure S17: Atomic displacement vectors of GAL for mode 5 at 2.33 THz. Yellow, red, and cyan spheres represent, respectively, carbon, oxygen and hydrogen atoms, and the red dotted lines the H-bonds.

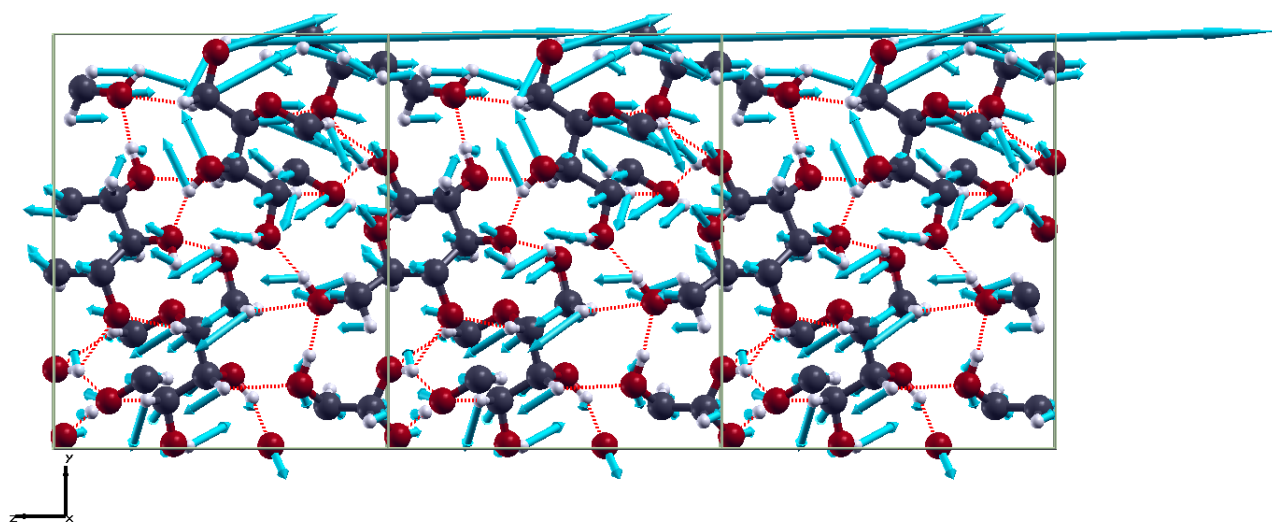

Figure S18: Atomic displacement vectors of  $\beta$ LA for mode 2 at 1.79 THz. Yellow, red, and cyan spheres represent, respectively, carbon, oxygen and hydrogen atoms, and the red dotted lines the H-bonds.
